# The Effects of Warming and Nitrogen Addition on Soil Nitrogen Cycling in a Temperate Grassland, Northeastern China

Lin-Na Ma<sup>1,3</sup>, Xiao-Tao Lü<sup>4</sup>, Yang Liu<sup>2</sup>, Ji-Xun Guo<sup>2\*</sup>, Nan-Yi Zhang<sup>2</sup>, Jian-Qin Yang<sup>2</sup>, Ren-Zhong Wang<sup>1\*</sup>

**1** State Key Laboratory of Vegetation and Environmental Change, Institute of Botany, The Chinese Academy of Sciences, Xiangshan, Beijing, China, **2** Key Laboratory of Vegetation Ecology, Ministry of Education, Northeast Normal University, Changchun, Jilin Province, China, **3** Graduate University of Chinese Academy of Sciences, Yuquanlu, Beijing, China, **4** State Key Laboratory of Forest and Soil Ecology, Institute of Applied Ecology, Chinese Academy of Sciences, Shenyang, China

## Abstract

**Background:** Both climate warming and atmospheric nitrogen (N) deposition are predicted to affect soil N cycling in terrestrial biomes over the next century. However, the interactive effects of warming and N deposition on soil N mineralization in temperate grasslands are poorly understood.

**Methodology/Principal Findings:** A field manipulation experiment was conducted to examine the effects of warming and N addition on soil N cycling in a temperate grassland of northeastern China from 2007 to 2009. Soil samples were incubated at a constant temperature and moisture, from samples collected in the field. The results showed that both warming and N addition significantly stimulated soil net N mineralization rate and net nitrification rate. Combined warming and N addition caused an interactive effect on N mineralization, which could be explained by the relative shift of soil microbial community structure because of fungal biomass increase and strong plant uptake of added N due to warming. Irrespective of strong intra- and inter-annual variations in soil N mineralization, the responses of N mineralization to warming and N addition did not change during the three growing seasons, suggesting independence of warming and N responses of N mineralization from precipitation variations in the temperate grassland.

**Conclusions/Significance:** Interactions between climate warming and N deposition on soil N cycling were significant. These findings will improve our understanding on the response of soil N cycling to the simultaneous climate change drivers in temperate grassland ecosystem.

**Citation:** Ma L-N, Lü X-T, Liu Y, Guo J-X, Zhang N-Y, et al. (2011) The Effects of Warming and Nitrogen Addition on Soil Nitrogen Cycling in a Temperate Grassland, Northeastern China. PLoS ONE 6(11): e27645. doi:10.1371/journal.pone.0027645

**Editor:** Ben Bond-Lamberty, DOE Pacific Northwest National Laboratory, United States of America

**Received:** April 1, 2011; **Accepted:** October 21, 2011; **Published:** November 11, 2011

**Copyright:** © 2011 Ma et al. This is an open-access article distributed under the terms of the Creative Commons Attribution License, which permits unrestricted use, distribution, and reproduction in any medium, provided the original author and source are credited.

**Funding:** This research was supported by the Natural Science Foundation of China (30590382 and 30570273) and the National Basic Research Development Program of China (973 Program No. 2010CB951303 and 2007CB106806). The funders had no role in study design, data collection and analysis, decision to publish, or preparation of the manuscript.

**Competing Interests:** The authors have declared that no competing interests exist.

\* E-mail: malinna27@gmail.com

## Introduction

Anthropogenic increases in global atmospheric CO<sub>2</sub> concentration are contributing to rising global temperatures over some areas, including northeastern China [1,2]. Global anthropogenic N fixation now exceeds all natural sources of N fixation, and its products include greenhouse gases such as N<sub>2</sub>O that further contribute to climate change [3–5]. Many temperate ecosystems are predicted to experience rates of atmospheric N deposition as high as 2–5 g m<sup>-2</sup> above preindustrial rates over this century [6]. Responses of soil carbon (C) storage to ongoing climatic and atmospheric changes (e.g. warming, N deposition) determine whether terrestrial ecosystems will act as a source or sink of the atmospheric CO<sub>2</sub>. Soil N processes are tightly coupled to the soil carbon cycle, while the soil N cycle may be a key process influencing ecosystem response to warming [7]. Moreover, as a main limiting factor for plant growth and net primary productivity [8,9], understanding soil N availability and its response to climatic and atmospheric changes are vital for soil N dynamics and net

primary production and global C budgets in terrestrial ecosystems [10,11].

Previous studies involving field measurements and short- and long-term models have demonstrated that both warming and N addition individually alter soil N mineralization. Soil N mineralization has been found to increase with temperature under laboratory incubations through increasing soil microbial activity [12,13]. Consequently, elevated temperatures applied with different techniques in the field are reported to stimulate net N mineralization rates in various biomes across the world [14–16]. In N-limited ecosystems, N deposition (or addition) has potential to stimulate soil N mineralization through direct fertilization which may increase microbial activity temporarily and by indirectly altering soil organic matter quality (e.g., lower soil C: N ratio) [17–20].

Concurrent changes in warming and N deposition may potentially trigger complex interactive influences on ecosystem functioning. Although several related studies have documented the combined effects of warming and N deposition on soil N mineralization and N storage in forest and temperate old field

ecosystems [21,22], mechanistic understanding of the interactive effect of warming and N deposition on soil N mineralization is still limited. Available results show that soil N availability and N leaching in high-elevation spruce and fir forests will increase in response to regional warming under N saturation condition [21]. Recently, Turner and Henry [22] reported that N addition did not increase extractable inorganic N in warmed plots compared to unwarmed plots in old field ecosystem, because added N was mostly captured by live plant roots and microbes or lost to atmosphere and suggest that warming over winter may amplify soil N losses under conditions of N saturation. Compared with forest and old field ecosystems, less is known about the interactive effects of warming and N deposition on soil N mineralization in temperate grassland ecosystems.

The temperate grassland in northeastern China is an important repository of carbon, and is sensitive to climate changes [1]. Both water and N are important limiting factors in this area [23]. To examine the responses of soil N mineralization to climate warming and increased N deposition, we conducted a manipulative experiment including increased topsoil temperature of approximately 1.8°C and N addition ( $10 \text{ g m}^{-2} \text{ yr}^{-1}$ ) in the grassland. We hypothesized that (1) warming and N addition would significantly increase potential soil N mineralization in this study site, (2) there would be additive effects of combined warming and N addition on potential soil N mineralization, because warming and N addition both can increase soil microbial activity. In addition, the observations in this study were from three precipitation contrasting growing seasons. Thus, we also test the impacts of precipitation variations on responses of soil N mineralization and N availability to warming and N addition.

## Results

### Soil microclimate

Seasonal fluctuations of both soil temperature and water content produced one-peak patterns, higher in summer and lower in spring and autumn in the three growing seasons (Fig. 1A–F). Warming significantly increased soil temperature at the 15 cm depth (Repeated measures ANOVAs,  $F_{1, 20} = 6.33$ ,  $P < 0.05$ , Fig. 1A–C), whereas N addition did not significantly impact soil temperature. There was a significant interaction between warming and N addition in affecting soil temperature ( $F_{1, 20} = 4.97$ ,  $P < 0.05$ ), in that warming significantly increased soil temperature under ambient N level but not under N-enriched conditions. Soil water content (0–15 cm) was noticeably drier in 2007 than in 2008 and 2009 ( $P < 0.001$ , Fig. 1D–F). Warming significantly reduced soil water content at the depth of 0–10 cm ( $F_{1, 20} = 6.74$ ,  $P < 0.05$ ), whereas N addition showed no effect. Warming and N addition significantly interacted to affect soil water content ( $F_{1, 20} = 5.56$ ,  $P < 0.05$ ); N addition showed a minor effect on soil water content under unwarmed plots but significantly decreased it under warmed plots.

### Treatment effects on control factors over soil N mineralization

Nitrogen addition increased soil bacterial to fungal PLFAs ratio (B: F) by 60%, 63% and 56% ( $P < 0.001$ , Fig. 2B), total PLFAs by 13.2%, 20.3% and 21.5% ( $P < 0.01$ , Fig. 2C), soil microbial biomass N (MBN) by 13.2%, 15.7% and 16.6% ( $P < 0.01$ , Fig. 2F), aboveground plant N content by 27%, 30.4% and 29.4% ( $P < 0.001$ , Fig. 2G) and belowground plant N content by 14.2%,

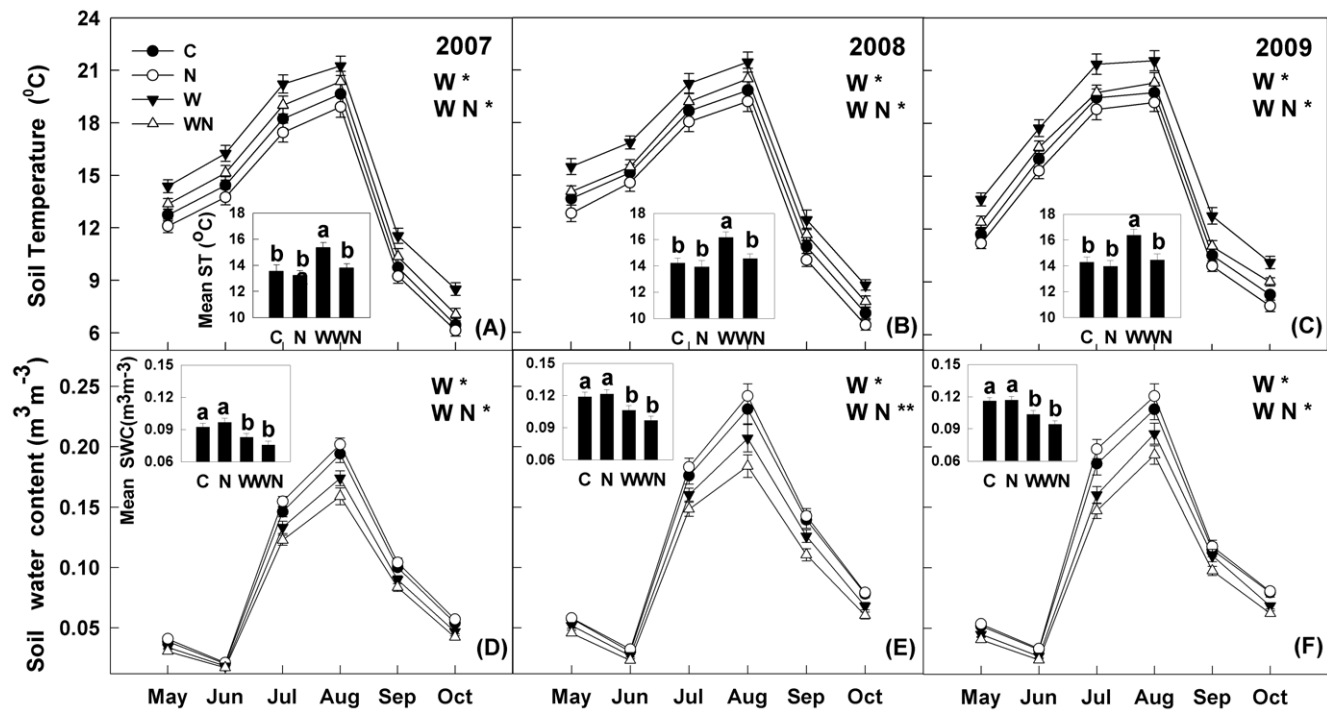

**Figure 1. Seasonal variations of soil temperature (ST) and soil water content (SWC) at 15 cm depth in response to warming (1.8°C) and N addition ( $10 \text{ g m}^{-2} \text{ yr}^{-1}$ ) in the temperate grassland of northeastern China.** Values show the means of ST and SWC from May to October in three years. The small pictures show the seasonal mean ST and SWC values of the three growing seasons under the four treatments. Vertical bars indicate standard errors of means ( $n = 6$ ). Difference lowercase letters indicate statistically significant differences ( $P < 0.05$ ). C = control, N = N addition, W = warming, WN = combined warming and N addition. \*, \*\* represent significant at  $P < 0.05$  and  $P < 0.01$ . doi:10.1371/journal.pone.0027645.g001

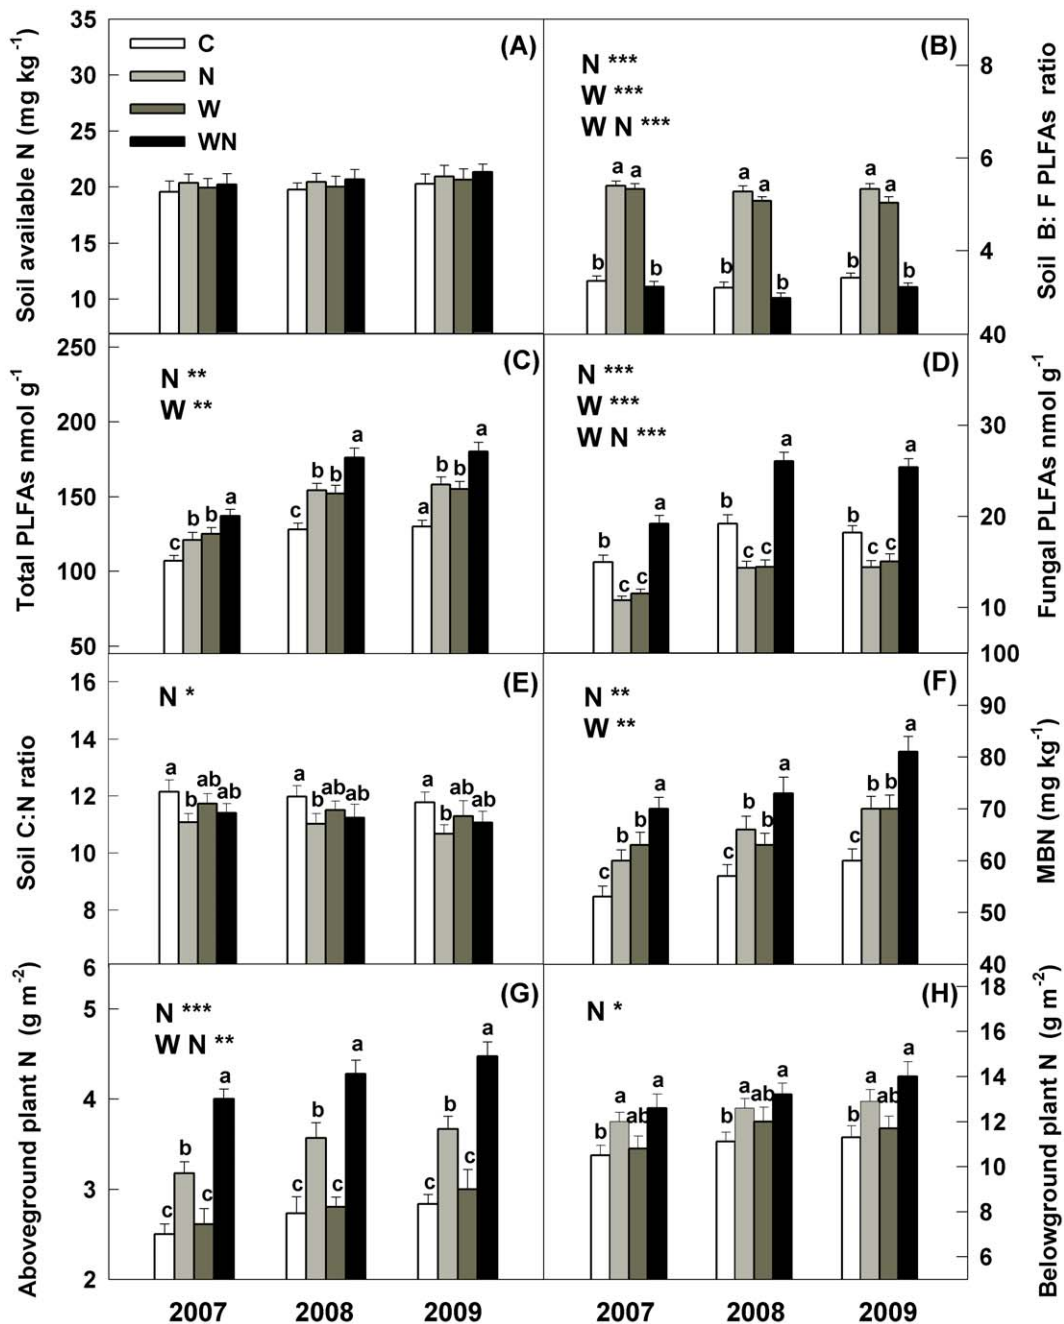

**Figure 2. Responses of soil available N, soil bacterial to fungal PLFAs ratio (B: F), soil total PLFAs, fungal PLFAs, soil C: N ratio, soil microbial biomass N (MBN), aboveground plant N and belowground plant N to warming (1.8°C) and N addition (10 g m<sup>-2</sup> yr<sup>-1</sup>) in the temperate grassland of northeastern China.** Values show the seasonal means of soil B: F, total PLFAs, fungal PLFAs, C: N and MBN from 2007 to 2009. Vertical bars indicate standard errors of means (n = 6). Difference lowercase letters indicate statistically significant differences ( $P < 0.05$ ). \*, \*\* and \*\*\* represent significant at  $P < 0.05$ ,  $P < 0.01$  and  $P < 0.001$ . See Fig.1 for abbreviations.  
doi:10.1371/journal.pone.0027645.g002

13.5% and 11.2% ( $P < 0.05$ , Fig. 2H) in 2007, 2008 and 2009, respectively. However, N addition decreased fungal PLFAs by 28%, 25.4% and 21% ( $P < 0.001$ , Fig. 2D), and soil C: N by 10.2%, 9.7% and 10% ( $P < 0.05$ , Fig. 2E) in 2007, 2008, and 2009, respectively.

Warming increased soil B: F by 58%, 57% and 47% ( $P < 0.001$ , Fig. 2B), total PLFAs by 16.8%, 18.7% and 19.2% ( $P < 0.01$ , Fig. 2C), and MBN by 17.7%, 12.5% and 16.6% ( $P < 0.01$ , Fig. 2F) in 2007, 2008 and 2009, respectively. However, warming

decreased fungal PLFAs by 23.2%, 24.7% and 17.4% ( $P < 0.001$ , Fig. 2D) in 2007, 2008, and 2009, respectively.

There were significant interactions between warming and N addition on soil B: F ( $P < 0.001$ ), soil fungal PLFAs ( $P < 0.001$ ), and aboveground plant N content ( $P < 0.01$ ) during the three growing seasons, as it was found that the increases in B: F and fungal PLFAs were significantly smaller and higher than would be expected if the two factors acted additively (Fig. 2B, D). Moreover,

warming showed no effect on aboveground plant N content but showed positive effects under enriched N condition (Fig. 2G).

### Control factors over soil N mineralization at the temporal and spatial scales

In general, the seasonal dynamics of soil net N mineralization rate (NMR) and net nitrification rate (NNR) showed unimodal pattern with the higher values in summer and lower values in spring and autumn over the three growing seasons (Fig. 3A–C, 4A–C). Soil NMR and NNR across four treatments in 2007 were

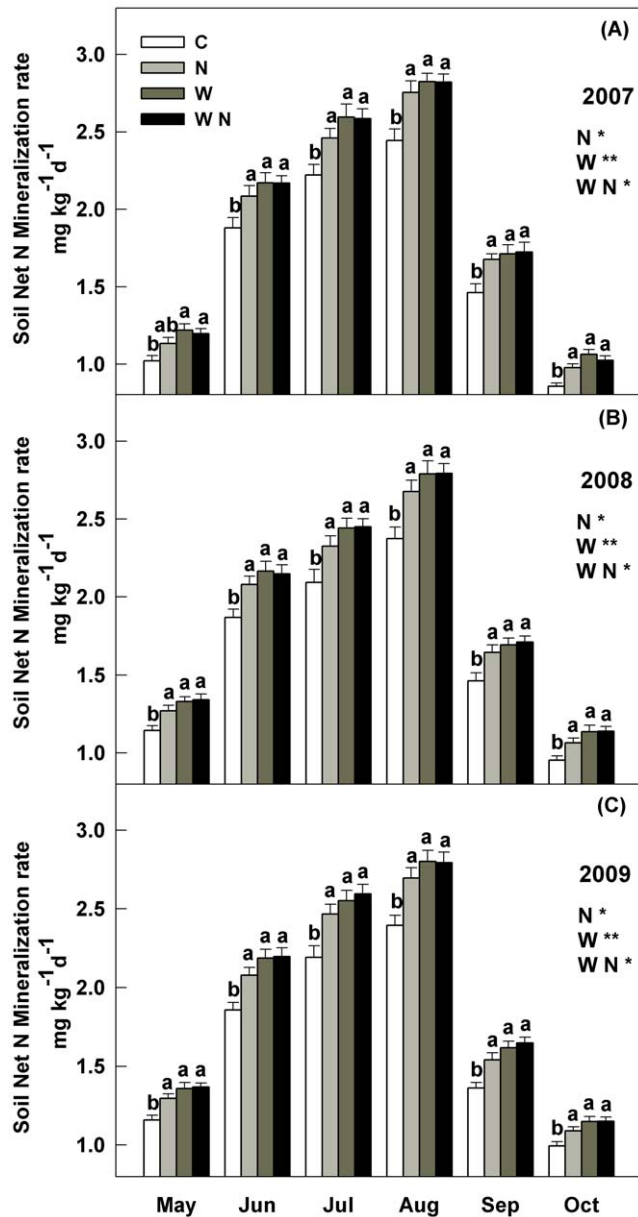

**Figure 3. Seasonal dynamics of soil net N mineralization rate (NMR) at 15 cm depth under warming (1.8°C) and N addition ( $10 \text{ g m}^{-2} \text{ yr}^{-1}$ ) treatments in temperate grassland of northeastern China.** Values show the monthly means of soil NMR from May to October in three years. Vertical bars indicate standard errors of means ( $n=6$ ). Difference lowercase letters indicate statistically significant differences ( $P<0.05$ ). \*, \*\* represent significant at  $P<0.05$  and  $P<0.01$ . See Figure 1 for abbreviations. doi:10.1371/journal.pone.0027645.g003

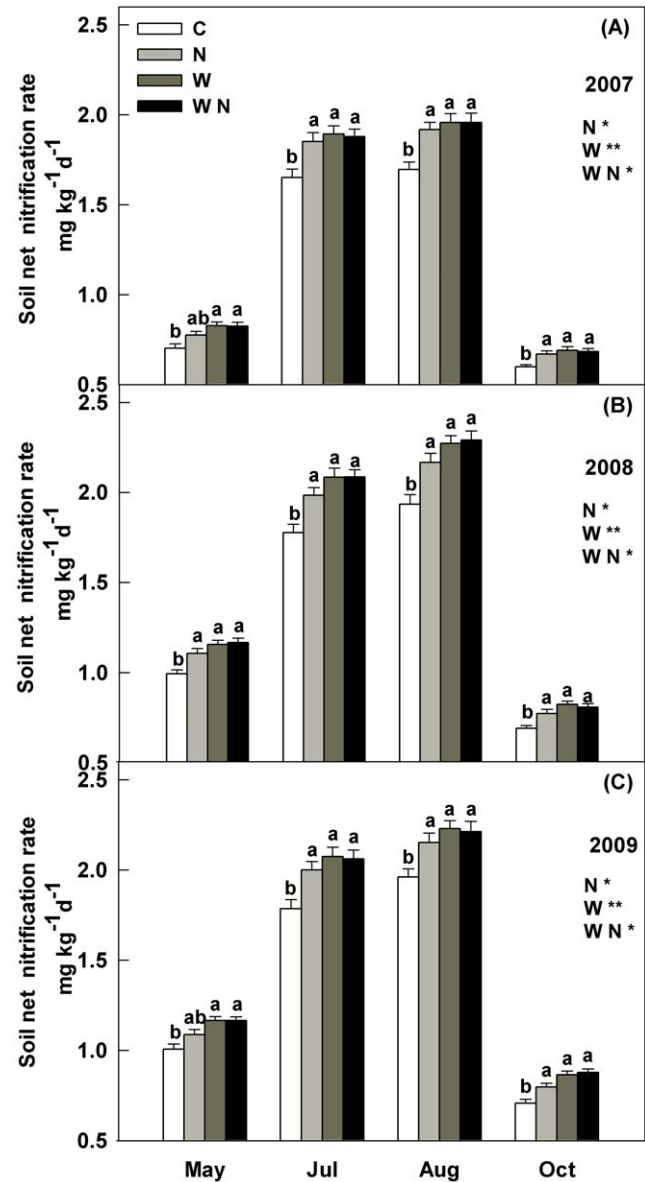

**Figure 4. Seasonal responses of soil net N nitrification rate (NNR) at 15 cm depth to warming (1.8°C) and N addition ( $10 \text{ g m}^{-2} \text{ yr}^{-1}$ ) in temperate grassland of northeastern China.** Values show the monthly means of soil NNR from May to October during the three growing seasons. Vertical bars indicate standard errors of means ( $n=6$ ). Difference lowercase letters indicate statistically significant differences ( $P<0.05$ ). \*, \*\* represent significant at  $P<0.05$  and  $P<0.01$ . See Figure 1 for abbreviations. doi:10.1371/journal.pone.0027645.g004

significant lower than those in 2008 and 2009 ( $P<0.001$ ). Across the three growing seasons, stepwise multiple regression analysis of soil NMR (or NNR) with control factors indicated the combination of soil temperature (partial  $R^2 = 0.43$  in NMR,  $P<0.001$ ; partial  $R^2 = 0.42$  in NNR,  $P<0.001$ ) and soil water content (partial  $R^2 = 0.29$  in NMR,  $P<0.01$ ; partial  $R^2 = 0.32$  in NNR,  $P<0.01$ ) explained 72% and 74% of the seasonal variations of soil NMR and NNR. These results suggest that all the concurrent seasonal variations of soil temperature and soil water content contributed to the temporal fluctuations of soil N mineralization.

Across the 24 plots, stepwise multiple regression analyses demonstrated that soil NMR showed a positive linear correlations

with mean soil total PLFAs and soil B: F, and negative linear correlation with soil C: N. Fifty-eight percent of the spatial variation in soil NMR could be explained by the soil B: F (partial  $R^2 = 0.24$ ,  $P < 0.01$ ) and total PLFAs (partial  $R^2 = 0.34$ ,  $P < 0.01$ ) in 2007. In 2008, soil B: F (partial  $R^2 = 0.27$ ,  $P < 0.01$ ), total PLFAs (partial  $R^2 = 0.38$ ,  $P < 0.01$ ) and soil C: N (partial  $R^2 = 0.8$ ,  $P < 0.01$ ) together accounted for 73% in NMR. In 2009, 71% of the spatial variability in NMR could be attributable to the combination of soil B: F (partial  $R^2 = 0.25$ ,  $P < 0.01$ ), total PLFAs (partial  $R^2 = 0.39$ ,  $P < 0.01$ ) and soil C: N (partial  $R^2 = 0.7$ ,  $P < 0.01$ ).

Similar to soil NMR, stepwise multiple regression analyses showed that soil B: F (partial  $R^2 = 0.26$ ,  $P < 0.01$ ) and total PLFAs (partial  $R^2 = 0.32$ ,  $P < 0.01$ ) contributed to 58% of the spatial variation in NNR in 2007. In 2008, B: F (partial  $R^2 = 0.24$ ,  $P < 0.01$ ) and total PLFAs (partial  $R^2 = 0.35$ ,  $P < 0.01$ ) were responsible for 59% of the spatial variation in NNR. In 2009, 67% of the changes in soil NNR can be explained by the combination of soil B: F (partial  $R^2 = 0.23$ ,  $P < 0.01$ ), total PLFAs (partial  $R^2 = 0.36$ ,  $P < 0.01$ ) and soil C: N (partial  $R^2 = 0.8$ ,  $P < 0.01$ ). These results suggest that abiotic (soil C: N) and biotic (soil microbial community structure and microbial biomass) factors played important roles in regulating spatial variations in soil N mineralization in the temperate grassland.

### Main effects on soil N mineralization

During the three years, the main effects of N addition and warming significantly increased soil NMR and NNR, and year did not interact with warming (or N addition) to affect NMR and NNR. Warming treatments had significantly greater soil NMR and NNR than the control, resulting in 18%, 16.9% and 17% higher soil NMR, and 14.8%, 17.6% and 18.3% higher NNR in 2007, 2008, and 2009, respectively ( $P < 0.01$ , Fig. 3A–C, 4A–C). N addition enhanced soil NMR by 12.3%, 11.8% and 11.9%, and NNR by 11%, 12.9%, and 15.3% in 2007, 2008, and 2009, respectively ( $P < 0.05$ , Fig. 3 A–C, 4 A–C).

### Interactive effect on soil N mineralization

Significant interactions between warming and N addition on soil NMR and NNR were observed ( $P < 0.05$ , Fig. 3 A–C, 4 A–C). Soil NMR in the combined warming and N addition treatments was only 17.5–20.1% ( $P < 0.01$ ) higher than in the control plots in all three years, while the additive effects of individual warming and N addition would much greater (28.7–30.3%). The increases in NNR (16.2–20.2% in three years) in the combined factors treatments were significant lower than the summed effects of warming and N addition separately (28.6–31.6%).

## Discussion

### Response of soil N mineralization to warming

In line with hypothesis 1, warming (+1.8°C) had positive effects on potential net N mineralization and net nitrification rates, as expected. The rapid increase in soil potential net N mineralization was possibly due to more soil microbial biomass (total PLFAs) (Fig. 2C) and active microbial activity in the warmed soil, and consequently a significant increase in soil organic matter decomposition. This is supported by observations in other grasslands [14,16]. However, soil available N concentration (AN) was not increased in the warmed plots (Fig. 2A) after the three growing seasons. This may be primarily attributed to the immobilization of soil microbes (Fig. 2F) and loss through emissions of greenhouse gases (e.g. NO, N<sub>2</sub>O, N<sub>2</sub>) from denitrification because of less N uptake by plant (Fig. 2G, H).

The rapid responses of soil N mineralization to increases in temperature observed in this study indicate that the temperate grassland soil N mineralization is sensitive to global warming.

### Response of soil N mineralization to N addition

In N-limited ecosystems, N deposition has widely been shown to stimulate soil N mineralization [18–20]. Similar results have been found in this study. The most probable explanation for the positive N effect is that N enrichment may increase microbial activity temporarily, either directly after fertilization causing a priming of soil organic matter mineralization [24], or indirectly when large quantities of lower C: N ratio residues are incorporated into soil organic matter, reducing soil C: N ratio (Fig. 2E) and then increasing N release during decomposition [17,25]. This is in keeping with the observations in temperate grassland in Northern China [26] and in an acidic and calcareous grassland in Britain [27]. However, N addition had a minor effect on soil AN concentrations (Fig. 2A) after the three growing seasons. This is likely due to the uptake of soil AN by plants and soil microbes, which then contributes to the significant increase of aboveground and belowground plant N content and MBN (Fig. 2F, G, H). These results therefore suggest that the increasing anthropogenic N deposition may be partly directly utilized by plants and microbes in the temperate grassland.

### Interactive effects of combined warming and N addition

Given that warming and N addition can significantly increase soil N mineralization, it is reasonable to assume there would be additive effects of these two treatments on soil N mineralization. However, in contrast to our expectation, the increases in soil N mineralization were significantly smaller than would be expected if the two factors acted additively.

The combined warming and N addition caused an antagonistic effect. This antagonistic effect could be largely explained by the relative changes of soil microbial community structure (B: F) and aboveground plant N content in the combined warming and N addition treatment. The relative lower B: F (Fig. 2B) due to the increase of fungal biomass (Fig. 2D) under combined factors than the single factors may reduce the decomposition process. Firstly, fungal hyphae have long been recognized to enmesh microaggregates (<250 μm) into macroaggregates (>250 μm) [28,29], which contributes to SOM stabilization and protection by enhancing soil aggregation. Secondly, fungal cell walls contain more polymers such as melanin and chitin, which can persist in soil for years and account for significant pool of SOM compared with bacteria [30]. In addition, the strongly positive response of aboveground plant N content to combined warming and N addition (Fig. 2G) may also lead to more N uptake by local plants and the rapid decline of soil AN content, which could suppress the positive N effects on soil N mineralization. Similar to warming or N addition, combined warming and N addition only slightly increased soil AN concentration after the three growing season which might have been caused by absorption by local plants and microbes (Fig. 2F, G, H). Thus, these findings suggest that the multifactor effects can differ from simple combinations of single-factor responses. Considering the unprecedented climate warming associated with increasing N deposition under global climate change, multifactor experiments are needed in the future to fully understand the impacts of climatic and atmospheric changes on ecosystem N cycling.

### Impact of precipitation variation

In this study, soil water content partly controlled the temporal fluctuations of soil N mineralization indicating that soil water

content is an important factor for soil N mineralization. In addition, lower seasonal mean soil NMR and NNR in the dry year (2007) than in wetter years (2008 and 2009) in all treatments ( $P < 0.001$ ) suggest that critical roles of soil water availability in regulating soil N mineralization in the temperate grassland in northeastern China. This is supported by some previous observations [31,32]. However, similar positive responses of soil N mineralization to warming (or N addition) amongst the three growing seasons imply that the responses of soil N mineralization to warming and N deposition were independent of precipitation variations in the temperate grassland. Thus, irrespective of the dependence of intra- and inter-annual variations in soil N mineralization on precipitation, precipitation variability may not alter the impacts of warming and N addition on soil N mineralization in the temperate grassland in northeastern China.

## Conclusions

Both warming and N addition enhanced soil N mineralization in the three consecutive years with fluctuating precipitation in the temperate grassland. Contrary to our prediction, combined warming and N addition produced a significantly interactive effect on soil N mineralization. This result might be ascribed to the relative changes in soil microbial community structure and plant N content. These findings highlight the importance of changes in abiotic (soil temperature, soil water content and soil C: N) and biotic (plant N content, soil microbial community structure and microbial biomass) in regulating ecosystem function in the temperate grassland. Moreover, although the drier year (2007) contributed to lower soil N mineralization, it did not alter the impacts of warming and N addition on soil N mineralization. Extra available N addition would be partly taken up by plants or soil microbes. The observations in the present study will facilitate long-term projections of regional soil N cycling and improve our understanding of soil N cycling response to the simultaneous climate change drivers in temperate grassland ecosystems.

## Materials and Methods

### Ethics Statement

The Research Station of Songnen Grassland Ecosystem (44°45'N, 123°45'E) is a department of Northeast Normal University. This study was approved by Key Laboratory of Vegetation Ecology, Ministry of Education, Northeast Normal University and State Key Laboratory of Vegetation and Environmental Change, Institute of Botany, the Chinese Academy of Sciences.

### Study site and Experimental design

The experiment was conducted at the Research Station of Songnen Grassland Ecosystem (44°45'N, 123°45'E), Jilin Province, northeastern China from 2006. The grassland is situated at the eastern edge of the Eurasian steppe and is characterized as Eurasian continental temperate grassland. Mean annual precipitation (1980–2006) was approximately 410 mm with 90% from May to October, while the total precipitation in 2007 (275.9 mm), 2008 (384.2 mm) and 2009 (390 mm) was 32.7%, 6.2% and 4.9% lower than the mean annual precipitation. Annual average air temperature was 4.9°C, and annual average land surface temperature was 6.2°C. Most of the grassland had a sodic saline meadow soil. Soil pH was 8.2, with 3% to 4% organic matter in the surface layer. The vegetation at the site was dominated by the perennial grass *Leymus chinensis* (Trin.) Tzvel., whereas *Kalimeris integrifolia* Turcz. ex DC., *Carex duriuscula* C. A. Mey., and *Rhizoma Phragmites* were also present at lower density. Shoot heights were

typically 30–40 cm, and the maximum litter accumulation about 0.5 kg m<sup>-2</sup> [33].

The experiment was employed in a complete randomized block factorial experimental design with warming and N addition as fixed factors and two levels for each factor. There were four treatments (control, warming, N addition and combination of warming and N addition), with six replicates for each treatment. The size of each plot was 2 m × 3 m. All the warmed plots were heated continuously by infrared radiators (Kalglo Electronics Inc. Bethlehem, PA, MSR-2420, USA) suspended 2.25 m over the plot center. In each control or N addition plot, one 'dummy' heater with the same shape and size as the shading effects of the infrared radiator. All the heaters under the warming treatments were set at a radiation output of approximately 1700 W. He et al. estimated that airborne N up to 80–90 g m<sup>-2</sup> yr<sup>-1</sup> and higher N deposition would occur in the future owing to land-use change and anthropogenic activities [34,35]. In addition, Bai et al. estimated that the community saturation of N deposition rates was approximately 10.5 g m<sup>-2</sup> yr<sup>-1</sup> in this temperate grassland ecosystem [36], even though the atmospheric N deposition in this temperate ecosystem was as high as 2.7 g m<sup>-2</sup> yr<sup>-1</sup> in recent ten years [35]. Thus, in the fertilized plots, we added a pulse of aqueous ammonium nitrate on the first day in May at a rate of 10 g m<sup>-2</sup> yr<sup>-1</sup>. Ambient N plots received the same amount of water as the N addition plots in the spring (equivalent to <2 mm of rain), but no added N.

### Soil microclimate measurements and samplings

Soil temperature and water content were measured by using an ECH<sub>2</sub>O dielectric aquameter (Em50, USA), which automatically measured soil temperature and soil water content at a depth of 15 cm at 8: 00–9: 00 in late May, mid-June, mid-July, early August, mid-September and mid-October in 2007, 2008 and 2009. Five measures were taken and averages of the five measures were stored as the mean value per plot.

Soil core samples were collected concurrently from two random locations in each plot for determination of soil potential net N mineralization and nutrient. Soil samples were taken with a cylindrical soil sampler (5 cm inner diameter, 15 cm length) for the 0–15 cm layer, and then immediately preserved at 4°C in a cooler for transport to the laboratory. The fresh samples were processed using a 2 mm sieve and manually cleaned of any visible plant tissues. The two replicates from the same depth on each plot were pooled and treated as a single sample for analysis.

### Soil N mineralization and nutrient measurements

Soil N mineralization was assessed in the lab using an aerobic procedure [37,38]. In order to minimize disturbance of microbial activity, fresh (not dried) soil samples were used [39]. A soil subsample (about 10 g dry weight) was mixed thoroughly with 10 g acid-washed sand (The added acid-washed sand can widen the soil pore and make for thorough soil N mineralization) and transferred to a 250 ml triangle bottle, then was adjusted soil water content to 60% water-holding capacity. The bottles were covered with 0.01 mm thick plastic film and were incubated at 25°C for fourteen days in a constant temperature cabinet (SHP-25, China). During incubation, the bottles weighed periodically, and had deionized water added to maintain a constant water content. To analyze the available N (NH<sub>4</sub><sup>+</sup>-N + NO<sub>3</sub><sup>-</sup>-N) concentrations, each un-incubated and incubated soil sample was added 100 ml of 2 M KCl solution. The mixture of soil and extractant was shaken for 1 hour on a reciprocal shaker, and then centrifuged for 10 minutes. Supernatant was collected with a pipette and was frozen for later. Soil available N (NH<sub>4</sub><sup>+</sup>-N + NO<sub>3</sub><sup>-</sup>-N) concentrations in

the incubated and un-incubated soil subsamples were estimated by steam distillation of the supernatants with subsequent titration [40]. The  $\text{NO}_3^-$ -N concentrations were determined by UV - photometrically at 210 nm [41]. Soil net N mineralization rate and net nitrification rate were calculated as the changes in available N ( $\text{NH}_4^+$ -N +  $\text{NO}_3^-$ -N) and  $\text{NO}_3^-$ -N in the initial and incubated subsamples.

Soil microbial biomass N (MBN) was measured using a chloroform fumigation-direct extraction procedure [42]. MBN were calculated as the difference in available N contents between the fumigated and the unfumigated samples using conversion factors ( $k_{\text{en}}$ ) of 0.45 [43]. Soil total N (TN) was determined via digestion with  $\text{H}_2\text{SO}_4$  by the Kjeldahl method [44]. Soil organic C (SOC) was measured with the dichromate oxidation method [45].

### Microbial community structure

The PLFAs were extracted and quantified from 8.0 g (dry weight equivalent) soils using a procedure previously described by Bossio et al. [46]. The separation and identification of extracted PLFAs were carried out according to the standard protocol of the Sherlock Microbial Identification System V3.1 (MIDI, 1999) and a Gas Chromatograph (Hewlett Packard 6850, USA). Fatty acid nomenclature used in the present research was as that defined by Bossio et al. [46]. The following fatty acids i15: 0, a15: 0, i16: 1c, i16: 0, 16: 1w7c, i17: 0, 17: 1w6c, a17: 0, 17: 0cy, 18: 1w7c, 18: 1w5c and 19: 0cy were chosen to represent the PLFAs of the bacterial group [47,48]. Also three fatty acids (16: 1w5c, 18: 2w6, 9c and 18: 1w9c) were used to represent the fungal group [49]. The ratio of bacterial and fungal fatty acids was also included in the data analysis. This ratio has often been used as the indicator of the change in the soil microbial community structure [50].

### Plant N content measurements

Twenty replicate plant samples in each plot with intact root systems were collected for fall 2007, 2008 and 2009. We used *L.*

*chinensis* as indicator species because it was abundant and uniformly distributed across the study site. Each plant was divided into above- and belowground parts, oven-dried at + 70°C. Each individual above- and belowground sample was analyzed for plant aboveground and belowground N contents by the Kjeldahl method after acid digestion [44].

### Statistical Analysis

Seasonal mean values used in this study were calculated from the monthly mean values, which were first averaged from all measurements in the same month. Repeated measures ANOVAs were used to examine the temporal (inter- or intra-annual) variations and the effects of warming and N addition on soil N mineralization, soil temperature, soil water content, soil total PLFAs, fungal PLFAs, B: F, MBN, AN, C: N, and above- and belowground plant N content. Between-subject effects were evaluated as warming, N addition, and their interactions, and within-subject effects were year (or measuring times within season) and its interactions with warming or N addition. Stepwise multiple linear analyses were used to determine the relationships of soil NMR (or soil NNR) with control factors. Statistical analyses were conducted using SPSS (SPSS 11.0 for windows, USA).

### Acknowledgments

We thank two anonymous reviewers for their constructive comments, which helped in improving the manuscript; Jianyang Xia and Guofang Liu for the suggestion in the statistical analysis; and Kun Tian, Gang Dong and Song Gao for providing meteorological data.

### Author Contributions

Conceived and designed the experiments: J-XG R-ZW. Performed the experiments: L-NM YL N-YZ J-QY. Analyzed the data: L-NM X-TL. Wrote the paper: L-NM X-TL.

### References

- Zhou GS, Wang YH, Jiang YL (2002) Global changes and water-drive IGBP-NECT northeast China transect. *Earth Sci Front* 9: 198–216.
- IPCC (Intergovernmental Panel on Climate Change) (2007) *Climate change 2007: the science of climate change*. New York: Cambridge University Press.
- Vitousek PM, Aber JD, Howarth RW, Likens GE, Matson PA, et al. (1997) Human alteration of the global nitrogen cycle: sources and consequences. *Ecol Appl* 7: 737–750.
- Galloway JN, Cowling EB (2002) Reactive nitrogen and the world: 200 years of change. *Ambio* 31: 64–71.
- Gruber N, Galloway JN (2008) An Earth-system perspective of the global nitrogen cycle. *Nature* 451: 293–296.
- Galloway JN, Dentener FJ, Capone DG, Boyer EW, Horwarth EW, et al. (2004) Nitrogen cycles, past, present, and future. *Biogeochemistry* 70: 152–226.
- Perry DA, Borchers JG, Turner DP (1991) Biological feedbacks to climate change: terrestrial ecosystems as sinks and sources of carbon and nitrogen. *Northwest Environ J* 7: 203–232.
- Seastedt TR, Briggs JM, Gibson DJ (1991) Ambient nitrogen limitation in tall grass prairie. *Oecologia* 87: 72–79.
- Wedin D, Tilman D (1993) Competition among grasses along a nitrogen gradient: initial conditions and mechanisms of competition. *Ecol Monogr* 63: 199–229.
- Hungate BA, Dukes JS, Shaw MR, Luo Y, Field CB (2003) Nitrogen and climate change. *Science* 302: 1512–1513.
- Luo YQ, Su B, Currie WS, Dukes JS, Finzi A, et al. (2004) Progressive nitrogen limitation of ecosystem responses to rising atmospheric carbon dioxide. *Bioscience* 54: 731–739.
- Cookson WR, Cornforth IS, Rowarth JS (2002) Winter soil temperature (2–5°C) effects on N transformations in clover green manure amended or unamended soils: a laboratory and field study. *Soil Biol Biochem* 34: 1401–1415.
- Dalias P, Anderson JM, Botner P, Couteaux MM (2002) Temperature responses of net N mineralization and nitrification in conifer forest soils incubated under standard laboratory conditions. *Soil Biol Biochem* 34: 691–701.
- Rustad LE, Campbell JL, Marion GM, Norby RJ, Mitchell MJ, et al. (2001) A meta-analysis of the response of soil respiration, net nitrogen mineralization, and aboveground plant growth to experimental ecosystem warming. *Oecologia* 126: 543–562.
- Shaw MR, Harte J (2001) Response of nitrogen cycling to simulated climate change: differential responses along a subalpine ecotone. *Global Change Biol* 7: 193–210.
- Wan SQ, Hui DF, Wallace L, Luo Y (2005) Direct and indirect warming effects on ecosystem carbon processes in a tallgrass prairie. *Global Biogeochem Cy* 19: GB2014. doi:10.1029/2004GB002315.
- Aber JD, McDowell W, Nadelhoffer KJ, Magill A, Berntson G, et al. (1998) Nitrogen saturation in temperate forest ecosystems. *BioScience* 48: 921–934.
- Loiseau P, Soussana JF (2000) Effects of elevated  $\text{CO}_2$  temperature and N fertilization on fluxes in a grassland ecosystem. *Global Change Biol* 6: 953–965.
- Li X, Meixner T, Sickman JO, Miller AE, Schimel JP, et al. (2006) Decadal-scale dynamics of water, carbon and nitrogen in a California chaparral ecosystem: DAYCENT modeling results. *Biogeochemistry* 77: 217–245.
- Vourlitis GL, Zorba G (2007) Nitrogen and carbon mineralization of semi-arid shrubland soil exposed to long-term atmospheric nitrogen deposition. *Biol Fertil Soils*. Doi: 10.1007/s00374-006-0137-y.
- Garten CT (2000) Nitrogen saturation and soil N availability in a high-elevation spruce and fir forest. *Water Air Soil Poll* 120: 295–313.
- Turner MM, Henry HAL (2010) Net nitrogen mineralization and leaching in response to warming and nitrogen deposition in a temperate old field: the importance of winter temperature. *Oecologia* 162: 227–236.
- Zhu TC (2004) *Yang-Cao biological ecology*. Jilin: Jilin Science and Technology Press.
- Lovell RD, Hatch DJ (1998) Stimulation of microbial activity following spring applications of nitrogen. *Biol Fertil Soils* 26: 28–30.
- Boggs LC, Pikul Jr. JL, Vigil MF, Riedell WE (2000) Soil nitrogen mineralization influenced by rotation and nitrogen fertilization. *Soil Sci Soc Am J* 64: 2038–2045.
- Zhang L, Huang JH, Bai YF, Han XG (2009) Effects of nitrogen addition on net nitrogen mineralization in *Leymus chinensis* grassland, Inner Mongolia, China. *Acta Ecologica Sinica* 33(3): 563–569.

27. Lee JA, Caporn SJM (1998) Ecological effects of atmospheric reactive nitrogen deposition on semi-natural terrestrial ecosystems. *New Phytol* 139: 127–134.
28. Jastrow JD, Miller RM, Lussenhop J (1998) Contributions of interacting biological mechanisms to soil aggregate stabilization in restored prairie. *Soil Biol Biochem* 30: 905–916.
29. Bossuyt H, Deneff D, Six J, Frey SD, Merckx R, et al. (2001) Influence of microbial populations and residue quality on aggregate stability. *Appl Soil Ecol* 16: 195–208.
30. Bailey VL, Smith JL, Bolton Jr. H (2002) Fungal-to-bacterial ratios in soils investigated for enhanced C sequestration. *Soil Biol Biochem* 34: 997–1007.
31. Nicolardot B, Recous S, Mary B (2001) Simulation of C and N mineralization during crop residue decomposition: a simple dynamics model based on the C: N ratio of the residue. *Plant Soil* 228: 83–103.
32. Zhou LS, Huang JH, Lü FM, Han XG (2009) Effect of prescribed burning and seasonal and interannual climate variation on nitrogen mineralization in a typical steppe in Inner Mongolia. *Soil Biol Biochem* 41: 796–803.
33. Zhou DW, Ripley EA (1997) Environmental changes following burning in a Songnen grassland, China. *J Arid Environ* 36: 53–65.
34. He CE, Liu XJ, Andreas F, Zhang FS (2007) Quantifying the total airborne nitrogen input into agroecosystems in the North China Plain. *Agr Ecosyst Environ* 121: 395–400.
35. Zhang Y, Zheng LX, Liu XJ, Jickells T, Cape JN, et al. (2008) Evidence for organic N deposition and its anthropogenic sources in China. *Atmospheric Environment* 42: 1035–1041.
36. Bai YF, Wu JG, Clark CM, Naeem S, Pan QM, et al. (2010) Tradeoffs and thresholds in the effects of nitrogen addition on biodiversity and ecosystem functioning: evidence from Inner Mongolia grasslands. *Global Change Biol* 16: 358–372.
37. Marrs RH, Proctor J, Heaney A, Mountford MD (1988) Changes in soil N mineralization and nitrification along an altitudinal transect in tropical rain forest in Costa Rica. *J Ecol* 76: 466–482.
38. Bao SD (1999) *Agriculture Soil Chemical Analysis*. Beijing, China: Science Press. pp 263–271.
39. Neve SD, Hofman GH (1996) Modeling N mineralization of vegetable crop residues during laboratory incubation. *Soil Biol Biochem* 28: 1451–1457.
40. Allen SE, Grimshaw HM, Parkinson JA, Quarmley C (1974) *Chemical analysis of ecological materials*. London, England: Blackwell Scientific Publishers.
41. Stenger R, Priesack E, Beese F (1995) Rates of net nitrogen mineralization in diaturbed and undisturbed soils. *Plant Soil* 171: 323–332.
42. Vance ED, Brookes PC, Jenkinson DS (1987) An extraction method for measuring soil microbial biomass C. *Soil Biol Biochem* 19: 703–707.
43. Jenkinson DS (1988) Determination of microbial biomass carbon and nitrogen in soil. In: Wilson JR (ed.) *Advances in Nitrogen Cycling in Agricultural Ecosystems*. Wallingford, UK: CAB International. pp 368–386.
44. Bremner JM, Mulvaney CS (1982) Nitrogen-total. In: Page AL, Miller RH, Keeney DR (eds) *Methods of soil analysis*. Madison: American Society of Agronomy. pp 595–608.
45. Nelson DW, Sommers LE (1982) Total carbon, organic carbon, and organic matter. In: Page AL, Miller RH, Keeney DR (eds) *Methods of soil analysis*. Madison: American Society of Agronomy. pp 539–579.
46. Bossio DA, Scow KM (1998) Impacts of carbon and flooding on soil microbial communities: phospholipid fatty acids profiles and substrate utilization patterns. *Microbial Ecol* 35: 265–278.
47. Frostegard A, Baath E (1996) The use of phospholipid fatty acid analysis to estimate bacterial and fungal biomass in soil. *Biol Fertil Soils* 22: 59–65.
48. Zhang W, Parker KM, Luo Y, Wan S, Wallace LL, et al. (2005) Soil microbial responses to experimental warming and clipping in a tallgrass prairie. *Global Change Biol* 11: 266–277.
49. Mikola J, Setälä H (1999) Interplay of omnivory, energy channels and C availability in a microbial-based soil food web. *Biol Fertil Soils* 28: 211–218.
50. Fierer N, Schimel JP, Holden PA (2002) Variation in microbial community composition through two soil depth profiles. *Soil Biol Biochem* 35: 167–176.
